# Supplementary material
Source: HighWire-hosted journal article supplement (https://erj.ersjournals.com/content/57/3/2002050)
Supplement: inline-supplementary-material-2 [file inline-supplementary-material-2.pdf]

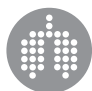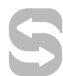

SHAREABLE PDF

# A high-risk airway mycobiome is associated with frequent exacerbation and mortality in COPD

Pei Yee Tiew<sup>1,2</sup>, Alison J. Dicker<sup>3</sup>, Holly R. Keir<sup>3</sup>, Mau Ern Poh<sup>4</sup>, Sze Lei Pang<sup>5</sup>, Micheál Mac Aogáin<sup>1</sup>, Branden Qi Yu Chua<sup>1</sup>, Jiunn Liang Tan<sup>4</sup>, Huiying Xu<sup>6</sup>, Mariko Siyue Koh<sup>5</sup>, Augustine Tee<sup>7</sup>, John Arputhan Abisheganaden<sup>6</sup>, Fook Tim Chew<sup>5</sup>, Bruce E. Miller<sup>8</sup>, Ruth Tal-Singer<sup>8</sup>, James D. Chalmers<sup>3</sup> and Sanjay H. Chotirmall<sup>1</sup>

**Affiliations:** <sup>1</sup>Lee Kong Chian School of Medicine, Nanyang Technological University Singapore, Singapore. <sup>2</sup>Dept of Respiratory and Critical Care Medicine, Singapore General Hospital, Singapore. <sup>3</sup>Scottish Centre for Respiratory Research, University of Dundee, Ninewells Hospital and Medical School, Dundee, UK. <sup>4</sup>Dept of Medicine, Faculty of Medicine, University of Malaya, Kuala Lumpur, Malaysia. <sup>5</sup>Dept of Biological Sciences, National University of Singapore, Singapore. <sup>6</sup>Dept of Respiratory and Critical Care Medicine, Tan Tock Seng Hospital, Singapore. <sup>7</sup>Dept of Respiratory and Critical Care Medicine, Changi General Hospital, Singapore. <sup>8</sup>Medical Innovation, GSK R&D, Collegeville, PA, USA.

**Correspondence:** Sanjay H. Chotirmall, Lee Kong Chian School of Medicine, Nanyang Technological University, 11 Mandalay Road, Singapore 308232. E-mail: schotirmall@ntu.edu.sg

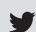

@ERSpublications

The airway mycobiome in COPD is important, and associates with exacerbations, survival and systemic immune responses <https://bit.ly/32WA5kI>

**Cite this article as:** Tiew PY, Dicker AJ, Keir HR, *et al.* A high-risk airway mycobiome is associated with frequent exacerbation and mortality in COPD. *Eur Respir J* 2021; 57: 2002050 [<https://doi.org/10.1183/13993003.02050-2020>].

This single-page version can be shared freely online.

## ABSTRACT

**Introduction:** The chronic obstructive pulmonary disease (COPD) bacteriome associates with disease severity, exacerbations and mortality. While COPD patients are susceptible to fungal sensitisation, the role of the fungal mycobiome remains uncertain.

**Methods:** We report the largest multicentre evaluation of the COPD airway mycobiome to date, including participants from Asia (Singapore and Malaysia) and the UK (Scotland) when stable (n=337) and during exacerbations (n=66) as well as nondiseased (healthy) controls (n=47). Longitudinal mycobiome analysis was performed during and following COPD exacerbations (n=34), and examined in terms of exacerbation frequency, 2-year mortality and occurrence of serum specific IgE (sIgE) against selected fungi.

**Results:** A distinct mycobiome profile is observed in COPD compared with controls as evidenced by increased  $\alpha$ -diversity (Shannon index;  $p<0.001$ ). Significant airway mycobiome differences, including greater interfungal interaction (by co-occurrence), characterise very frequent COPD exacerbators (three or more exacerbations per year) (permutational multivariate ANOVA; adjusted  $p<0.001$ ). Longitudinal analyses during exacerbations and following treatment with antibiotics and corticosteroids did not reveal any significant change in airway mycobiome profile. Unsupervised clustering resulted in two clinically distinct COPD groups: one with increased symptoms (COPD Assessment Test score) and *Saccharomyces* dominance, and another with very frequent exacerbations and higher mortality characterised by *Aspergillus*, *Curvularia* and *Penicillium* with a concomitant increase in serum sIgE levels against the same fungi. During acute exacerbations of COPD, lower fungal diversity associates with higher 2-year mortality.

**Conclusion:** The airway mycobiome in COPD is characterised by specific fungal genera associated with exacerbations and increased mortality.
